# Supplementary material
Source: publisher figshare collection journal article supplement (https://frontiersin.figshare.com/ndownloader/files/24381776)
Supplement: Supplementary file [file 24381776]

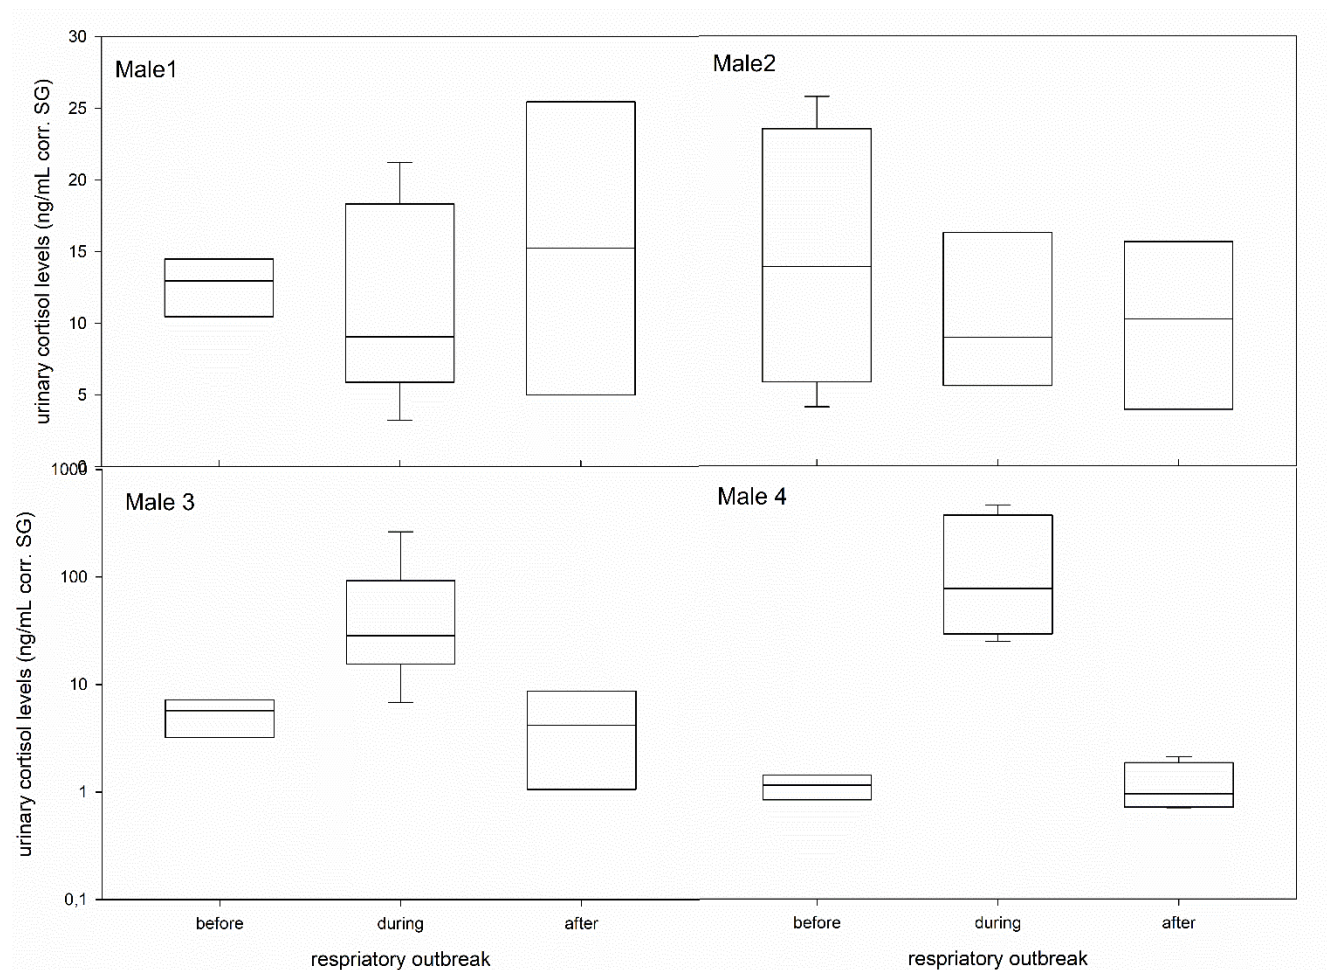

Supplement Figure 1: Urinary cortisol levels of two asymptomatic chimpanzee males (males 1 and 2) and two males with sickness symptoms (males 3 and 4) in relation to sample periods (before, during and after a respiratory outbreak). Indicated are the median (black bar). Boxes indicate quartiles (25 and 75%) and vertical lines represent quantiles (2.5 and 97.5%). Y-axis for the two males with symptoms were log transformed.
